# Supplementary material for: Half-metallic and ferromagnetic phases in CrSH monolayers using DFT+U and BO-MD calculations
Source: Royal Society of Chemistry journal article supplement (doi:10.1039/d4cp04563g), 2025-01-01
Supplement: d4cp04563g2.pdf [file d4cp04563g2.pdf]

# Supplementary Information

## Half-metallic and ferromagnetic phases in CrSH monolayer using DFT+ $U$ and BO-MD calculations

Akkarach Sukserm,<sup>a</sup> Jakkapat Seeyangnok,<sup>a</sup> and Udomsilp Pinsook<sup>\*a</sup>

### Magnetocrystalline Anisotropy Energy (MAE) calculation

we performed the MAE calculations to determine the preferred magnetic easy axis for the FM CrSH. The MAE was calculated using the Force-Theorem approximation (Phys. Rev. B 90, 205409 (2014) and Phys. Chem. Chem. Phys., 2024, 26, 10111-10119). The MAE is defined as:

$$MAE = E_{\parallel} - E_{\perp},$$

where  $E_{\parallel}$  represents the energy when the spin moments are aligned along the x-y plane, and  $E_{\perp}$  represents energy when the spin moments are aligned along the z-axis.

#### Our calculated MAE results

##### For FM 1T-CrSH:

$$MAE_{1T} = (-550.3159eV) - (-550.3161eV) = +0.172meV/fu,$$

The positive  $MAE_{1T}$  value indicates that the magnetic easy axis lies in a perpendicular (z-axis) direction.

##### For 2H-CrSH:

$$MAE_{2H} = (-549.5262eV) - (-549.5244eV) = -1.775meV/fu.$$

The negative  $MAE_{2H}$  value suggests a preference for the magnetic easy axis to lie in the x-y plane.

# Examples of Quantum ESPRESSO (QE) input files

This section provides examples of input files such as the self-consistent field energy (SCF), Geometry optimization, and Born-Oppenheimer molecular dynamics (BO-MD) simulations for QE packages.

## 2x2x1 supercell for FM and AFM CrSH monolayers

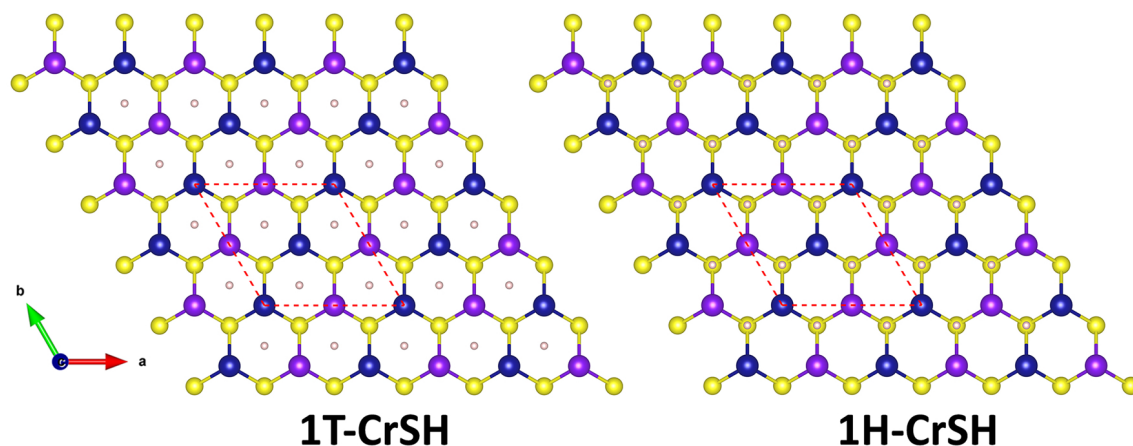

Figure S1: 2x2x1 supercell for CrSH monolayers: (Left) 1T-CrSH and (Right) 1H-CrSH.

## SCF.in for FM 1T-CrSH (12 atoms)

The input file SCF.in is used to calculate the ground-state energy calculation for FM 1T-CrSH (12 atoms).

```
1 &CONTROL
2   calculation = "scf"
3   forc_conv_thr = 1.00000e-04
4   nstep = 100
5   outdir = "/temp"
6   prefix = "prefix"
7   pseudo_dir = "./pseudo"
8   restart_mode = "from_scratch"
9   tprnfor = .TRUE.
10  tstress = .TRUE.
11 /
12
13 &SYSTEM
14   degauss = 1.0000e-02
15   ecutwfc = 8.00000e+01
16   ibrav = 4
17 a = 6.5133618
18 c = 20.000d-0
19   nat = 12
20   nspin = 2
21   ntyp = 4
22   assume_isolated = "2D"
23   occupations = "smearing"
24   smearing = "marzari-vanderbilt"
25   starting_magnetization(1) = 5.0d-1
26   starting_magnetization(2) = 5.0d-1
27 /
28
29 &ELECTRONS
30   conv_thr = 1.00000e-08
31   diago_david_ndim = 4
```

```

32 diagonalization = "david"
33 electron_maxstep = 250
34 mixing_beta = 7.00000e-01
35 mixing_mode = "plain"
36 startingpot = "atomic"
37 startingwfc = "atomic+random"
38 /
39
40 K_POINTS {automatic}
41 10 10 2 0 0 0
42
43 ATOMIC_SPECIES
44 Cr1 51.99610 Cr.pbe-spn-kjpaw_psl.1.0.0.UPF
45 Cr2 51.99610 Cr.pbe-spn-kjpaw_psl.1.0.0.UPF
46 H 1.00794 H.pbe-kjpaw_psl.1.0.0.UPF
47 S 32.06500 S.pbe-n-kjpaw_psl.1.0.0.UPF
48
49 HUBBARD {ortho-atomic}
50 U Cr1-3d 5.520e-0
51 U Cr2-3d 5.520e-0
52
53 ATOMIC_POSITIONS {crystal}
54 Cr1 0.000000 0.000000 0.500000
55 Cr1 0.500000 0.000000 0.500000
56 Cr2 0.500000 0.500000 0.500000
57 Cr2 0.000000 0.500000 0.500000
58 H 0.333333 0.166667 0.543345
59 H 0.333333 0.666667 0.543345
60 H 0.833333 0.166667 0.543345
61 H 0.833333 0.666667 0.543345
62 S 0.166667 0.333333 0.428455
63 S 0.166667 0.833333 0.428455
64 S 0.666667 0.333333 0.428455
65 S 0.666667 0.833333 0.428455

```

## OPT.in for Geometry optimization

The input file OPT.in is used to calculate the variable-cell relaxation optimization for FM and AFM 1H-CrSH (12 atoms). To switch between FM and AFM configurations, modify the sign of starting\_magnetization for Cr2.

```

1 &CONTROL
2 calculation = "vc-relax"
3 forc_conv_thr = 1.00000e-04
4 nstep = 100
5 outdir = "./temp/"
6 2H/O2Prop/temp_1FM/"
7 prefix = "prefix"
8 pseudo_dir = "./PP"
9 restart_mode = "from_scratch"
10 tprnfor = .TRUE.
11 tstress = .TRUE.
12 /
13
14 &SYSTEM
15 a = 6.509350
16 c = 2.00000e+01
17 degauss = 1.0000e-02
18 ecutwfc = 8.00000e+01
19 ibrav = 4
20 nat = 12
21 nspin = 2
22 ntyp = 4
23 assume_isolated = "2D"
24 occupations = "smearing"
25 smearing = "marzari-vanderbilt"
26 starting_magnetization(1) = 5.0d-1
27 starting_magnetization(2) = 5.0d-1 ! +0.5 for FM and -0.5 for AFM
28 /

```

```

29
30 &ELECTRONS
31     conv_thr      = 1.00000e-08
32     diago_david_ndim = 4
33     diagonalization = "david"
34     electron_maxstep = 250
35     mixing_beta    = 7.00000e-01
36     mixing_mode    = "plain"
37     startingpot    = "atomic"
38     startingwfc    = "atomic+random"
39 /
40 &IONS
41     ion_dynamics='bfgs'
42 /
43 &CELL
44     cell_dofree= '2Dxy'
45     cell_dynamics = 'bfgs' ,
46     press = 0.0D-0 ,
47     press_conv_thr= 0.5D-2,
48 /
49
50 K_POINTS {automatic}
51 10 10 1 0 0 0
52
53 ATOMIC_SPECIES
54 Cr1      51.99610  Cr.pbe-spn-kjpaw_psl.1.0.0.UPF
55 Cr2      51.99610  Cr.pbe-spn-kjpaw_psl.1.0.0.UPF
56 H        1.00794   H.pbe-kjpaw_psl.1.0.0.UPF
57 S        32.06500  S.pbe-n-kjpaw_psl.1.0.0.UPF
58
59 HUBBARD {ortho-atomic}
60 U Cr1-3d 5.520e-0
61 U Cr2-3d 5.520e-0
62
63 ATOMIC_POSITIONS {crystal}
64 Cr1 0.000000  0.000000  0.500000
65 Cr1 0.500000  0.000000  0.500000
66 Cr2 0.500000  0.500000  0.500000
67 Cr2 0.000000  0.500000  0.500000
68 H  0.166667  0.333333  0.543270
69 H  0.166667  0.833333  0.543270
70 H  0.666667  0.333333  0.543270
71 H  0.666667  0.833333  0.543270
72 S  0.166667  0.333333  0.428240
73 S  0.166667  0.833333  0.428240
74 S  0.666667  0.333333  0.428240
75 S  0.666667  0.833333  0.428240

```

## BOMD.in for FM 1H-CrSH (27 atoms)

the input file BOMD.in is used to calculate the Bo-MD calculation for 3x3x1 supercell of FM 1H-CrSH (27 atoms).

```

1 &CONTROL
2     calculation = 'md'
3     restart_mode = 'from_scratch'
4     outdir = './temp'
5     prefix = 'prefix'
6     pseudo_dir = './pseudo'
7     nstep = 10000
8     dt = 10.0
9 /
10 &SYSTEM
11     ecutwfc = 60.0
12    ibrav = 0
13     nat = 27
14     ntyp = 3
15     occupations= 'smearing'
16     smearing = "marzari-vanderbilt"
17     degauss = 0.02

```

```

18   nosym = .true.
19 /
20 &electrons
21   conv_thr =1.0d-8
22   mixing_beta = 0.4
23   electron_maxstep = 500000
24 /
25 &ions
26   ion_dynamics = 'verlet',
27   ion_temperature = 'berendsen'
28   tempw = 300.0
29   pot_extrapolation = 'second-order'
30   wfc_extrapolation = 'second-order'
31 /
32 ATOMIC_SPECIES
33 Cr      51.99610   Cr.pbe-spn-kjpaw_psl.1.0.0.UPF
34 H       1.00794   H.pbe-kjpaw_psl.1.0.0.UPF
35 S      32.06500   S.pbe-n-kjpaw_psl.1.0.0.UPF
36
37 ATOMIC_POSITIONS crystal
38 Cr      0.0000000000      0.0000000000      0.5087720000
39 Cr      0.0000000000      0.3333333333      0.5087720000
40 Cr      0.0000000000      0.6666666667      0.5087720000
41 Cr      0.3333333333      0.0000000000      0.5087720000
42 Cr      0.3333333333      0.3333333333      0.5087720000
43 Cr      0.3333333333      0.6666666667      0.5087720000
44 Cr      0.6666666667      0.0000000000      0.5087720000
45 Cr      0.6666666667      0.3333333333      0.5087720000
46 Cr      0.6666666667      0.6666666667      0.5087720000
47 H       0.2222200000      0.1111110000      0.5576730000
48 H       0.2222200000      0.4444443333      0.5576730000
49 H       0.2222200000      0.7777776667      0.5576730000
50 H       0.5555533333      0.1111110000      0.5576730000
51 H       0.5555533333      0.4444443333      0.5576730000
52 H       0.5555533333      0.7777776667      0.5576730000
53 H       0.8888866667      0.1111110000      0.5576730000
54 H       0.8888866667      0.4444443333      0.5576730000
55 H       0.8888866667      0.7777776667      0.5576730000
56 S       0.2222200000      0.1111110000      0.4335550000
57 S       0.2222200000      0.4444443333      0.4335550000
58 S       0.2222200000      0.7777776667      0.4335550000
59 S       0.5555533333      0.1111110000      0.4335550000
60 S       0.5555533333      0.4444443333      0.4335550000
61 S       0.5555533333      0.7777776667      0.4335550000
62 S       0.8888866667      0.1111110000      0.4335550000
63 S       0.8888866667      0.4444443333      0.4335550000
64 S       0.8888866667      0.7777776667      0.4335550000
65 CELL_PARAMETERS angstrom
66      8.5164000000      0.0000000000      0.0000000000
67     -4.2582010298      7.3754181542      0.0000000000
68      0.0000000000      0.0000000000      20.0000000000
69 K_POINTS automatic
70 2 2 1 0 0 0

```

Listing 1: Input file of 1H-CrSH phase (27 atoms) for the BO-MD simulation.

# Phonon Calculation Using PHONOPY and HIPHIVE packages

This section provides details of the workflow used for phonon calculations, including steps performed with the PHONOPY and HIPHIVE packages. Example input files and references are provided to assist readers in replicating similar workflows.

## Phonon Dispersion Using PHONOPY

The phonon dispersion calculations for CrSH monolayer were conducted using a combination of QE and PHONOPY packages. The detailed workflow is based on the tutorial available at <https://phonopy.github.io/phonopy/qe.html>. Below is an outline of the workflow:

- The initial input file (SCF\_uc.in) for FM 1T-CrSH unit cell (3 atoms) including atomic positions was required to generate displacement structures in 3x3x1 supercell (27 atoms). This file specifies the atomic positions, pseudopotentials, and computational parameters. The SCF\_uc.in file was also compatible with the QE package.

Phonopy command:

```
phonopy --qe -d --dim="3 3 1" -c SCF_uc.in
```

## SCF\_uc.in for a FM 1T-CrSH unit cell (3 atoms)

```
1  &CONTROL
2  calculation      = "scf"
3  forc_conv_thr   = 1.00000e-04
4  nstep           = 100
5  outdir          = "./temp"
6  prefix         = "prefix"
7  pseudo_dir     = "./PP"
8  restart_mode    = "from_scratch"
9  tprnfor        = .TRUE.
10 tstress        = .TRUE.
11 /
12
13 &SYSTEM
14 degauss         = 1.0000e-02
15 ecutwfc        = 8.00000e+01
16 ecutrho        = 7.20000e+02
17 ibrav          = 0
18 nat            = 3
19 nspin          = 2
20 ntyp           = 3
21 assume_isolated = "2D"
22 occupations    = "smearing"
23 smearing       = "marzari-vanderbilt"
24 starting_magnetization(1) = 5.0d-1
25 /
26
27 &ELECTRONS
28 conv_thr        = 1.00000e-08
29 diago_david_ndim = 4
30 diagonalization = "david"
31 electron_maxstep = 250
32 mixing_beta     = 7.00000e-01
33 mixing_mode     = "plain"
34 startingpot     = "atomic"
35 startingwfc     = "atomic+random"
```

```

36 /
37
38 K_POINTS {automatic}
39 20 20 2 0 0 0
40
41 ATOMIC_SPECIES
42 Cr      51.99610  Cr.pbe-spn-kjpaw_psl.1.0.0.UPF
43 H       1.00794  H.pbe-kjpaw_psl.1.0.0.UPF
44 S      32.06500  S.pbe-n-kjpaw_psl.1.0.0.UPF
45
46 HUBBARD {ortho-atomic}
47 U Cr1-3d 5.520e-0
48
49 CELL_PARAMETERS {bohr}
50  6.154233  0.000000  0.000000
51 -3.077117  5.329722  0.000000
52  0.000000  0.000000  37.794523
53
54 ATOMIC_POSITIONS {crystal}
55 Cr      0.000000  0.000000  0.500000
56 H       0.666667  0.333333  0.543345
57 S       0.333333  0.666667  0.428455

```

- The PHONOPY package was used to generate and obtain the displacement supercell input files (3x3x1 supercell). The displacement supercells were created. (e.g., supercell\_1.in, supercell\_2.in, ...)

### supercell\_1.in for FM 1T-CrSH supercell (27 atoms)

```

1  &CONTROL
2      calculation = "scf"
3      forc_conv_thr = 1.00000e-04
4      nstep = 100
5      outdir = ./temp01"
6      prefix = "prefix"
7      pseudo_dir = "./PP"
8      restart_mode = "from_scratch"
9      tprnfor = .TRUE.
10     tstress = .TRUE.
11 /
12
13 &SYSTEM
14     degauss = 1.0000e-02
15     ecutwfc = 6.00000e+01
16     ecutrho = 5.40000e+02
17     ibrav = 0
18     nat = 27
19     nspin = 2
20     ntyp = 3
21     ! assume_isolated = "2D"
22     occupations = "smearing"
23     smearing = "marzari-vanderbilt"
24     starting_magnetization(1) = 5.0d-1
25 /
26
27 &ELECTRONS
28     conv_thr = 1.00000e-08
29     diago_david_ndim = 4
30     diagonalization = "david"
31     electron_maxstep = 250
32     mixing_beta = 7.00000e-01
33     mixing_mode = "plain"
34     startingpot = "atomic"
35     startingwfc = "atomic+random"
36 /
37
38 K_POINTS {automatic}
39 10 10 1 0 0 0

```

```

40
41 CELL_PARAMETERS {bohr}
42   18.4626990000   0.0000000000   0.0000000000
43   -9.2313510000   15.9891660000   0.0000000000
44   0.0000000000   0.0000000000   37.7945230000
45
46 ATOMIC_SPECIES
47 Cr  51.99610   Cr.pbe-spn-kjpaw_psl.1.0.0.UPF
48 H   1.00794   H.pbe-kjpaw_psl.1.0.0.UPF
49 S  32.06500   S.pbe-n-kjpaw_psl.1.0.0.UPF
50
51 HUBBARD {ortho-atomic}
52 U Cr-3d 5.520e-0
53
54 ATOMIC_POSITIONS {crystal}
55 Cr  0.0004754770917795  0.0000000000000000  0.5004754770917795
56 Cr  0.3333333333333333  0.0000000000000000  0.5000000000000000
57 Cr  0.6666666666666666  0.0000000000000000  0.5000000000000000
58 Cr  0.0000000000000000  0.3333333333333333  0.5000000000000000
59 Cr  0.3333333333333333  0.3333333333333333  0.5000000000000000
60 Cr  0.6666666666666666  0.3333333333333333  0.5000000000000000
61 Cr  0.0000000000000000  0.6666666666666666  0.5000000000000000
62 Cr  0.3333333333333333  0.6666666666666666  0.5000000000000000
63 Cr  0.6666666666666665  0.6666666666666666  0.5000000000000000
64 H   0.2222233333333333  0.1111110000000000  0.5433450000000000
65 H   0.5555566666666666  0.1111110000000000  0.5433450000000000
66 H   0.8888900000000000  0.1111110000000000  0.5433450000000000
67 H   0.2222233333333333  0.4444443333333333  0.5433450000000000
68 H   0.5555566666666664  0.4444443333333333  0.5433450000000000
69 H   0.8888900000000000  0.4444443333333333  0.5433450000000000
70 H   0.2222233333333333  0.7777776666666667  0.5433450000000000
71 H   0.5555566666666666  0.7777776666666667  0.5433450000000000
72 H   0.8888900000000000  0.7777776666666667  0.5433450000000000
73 S   0.1111110000000000  0.2222233333333333  0.4284549999999999
74 S   0.4444443333333333  0.2222233333333333  0.4284549999999999
75 S   0.7777776666666666  0.2222233333333333  0.4284549999999999
76 S   0.1111110000000000  0.5555566666666666  0.4284549999999999
77 S   0.4444443333333334  0.5555566666666666  0.4284549999999999
78 S   0.7777776666666666  0.5555566666666666  0.4284549999999999
79 S   0.1111109999999999  0.8888899999999999  0.4284549999999999
80 S   0.4444443333333333  0.8888899999999999  0.4284549999999999
81 S   0.7777776666666666  0.8888899999999999  0.4284549999999999

```

- The force on each atom was calculated using QE's `pw.x` module for each displacement input file, resulting in output files (e.g., `supercell_1.out`, `supercell_2.out`, ...).
- The forces from the output files were processed to generate the `FORCE_SETS` file, which serves as input for PHONOPY to compute the phonon dispersion.

Phonopy command:

```
phonopy -f supercell_1.out supercell_2.out ...
```

The phonon dispersion was calculated using PHONOPY, and the results are presented in Figure 4(c) of the main manuscript (red dashed line).

## Incorporating Rotational Sum Rules with HIPHIVE package

To enhance the accuracy of the phonon dispersion and ensure compliance with physical invariance principles, rotational sum rules were applied using the HIPHIVE package. The methodology is detailed in the online documentation (eg. MoS2 monolayer and Graphene) at [https://hiphive.materialsmodeling.org/advanced\\_topics/rotational\\_sum\\_rules.html](https://hiphive.materialsmodeling.org/advanced_topics/rotational_sum_rules.html)

The procedure involves:



- The FORCE\_SETS file was converted to the extxyz format to make it compatible with HIPHIVE package (Forceset.extxyz).
- The rotational invariance corrections were enforced using HIPHIVE. Python scripts and step-by-step instructions from the HIPHIVE tutorial were followed to apply these corrections.
- The corrected phonon dispersion, incorporating rotational invariance, resolves spurious imaginary frequencies near the  $\Gamma$ -point in the flexural ZA mode.

## Forceset.extxyz for force set calculation in HIPHIVE package

```

1      27
2  Lattice="9.77004 0.0 0.0 -4.88502 8.46110284 0.0 0.0 0.0 20.0" Properties=species:S:1:
   pos:R:3:displacements:R:3:forces:R:3 pbc="T T T"
3  Cr  0.000000000 0.000000000 10.000000000 0.00438930 0.00000000 0.00898521
   -0.0474209460 0.0000251865 -0.0734513171
4  Cr  3.256680000 0.000000000 10.000000000 0.00000000 0.00000000 0.00000000
   0.0066732824 -0.0039597676 0.0051280489
5  Cr  6.513360000 0.000000000 10.000000000 0.00000000 0.00000000 0.00000000
   0.0036764036 -0.0018473485 0.0064974189
6  Cr  -1.628340000 2.820368000 10.000000000 0.00000000 0.00000000 0.00000000
   0.0018930859 -0.0011819468 0.0073176011
7  Cr  1.628340000 2.820368000 10.000000000 0.00000000 0.00000000 0.00000000
   -0.0014629762 0.0066082412 0.0041564287
8  Cr  4.885020000 2.820368000 10.000000000 0.00000000 0.00000000 0.00000000
   0.0001177386 0.0002085062 0.0080976741
9  Cr  -3.256680000 5.640735000 10.000000000 0.00000000 0.00000000 0.00000000
   0.0032675981 -0.0016642859 0.0066195464
10 Cr  0.000000000 5.640735000 10.000000000 0.00000000 0.00000000 0.00000000
   0.0001539911 0.0000398418 0.0079472645
11 Cr  3.256680000 5.640735000 10.000000000 0.00000000 0.00000000 0.00000000
   -0.0028318319 0.0018699537 0.0049879238
12 H  1.628340000 0.940123000 10.866900000 0.00000000 0.00000000 0.00000000
   0.0024674705 -0.0010485065 0.0007206625
13 H  4.885020000 0.940123000 10.866900000 0.00000000 0.00000000 0.00000000
   -0.0002406733 0.0001447429 -0.0072150500
14 H  8.141700000 0.940123000 10.866900000 0.00000000 0.00000000 0.00000000
   0.0009376636 0.0019167477 -0.0008757360
15 H  0.000000000 3.760490000 10.866900000 0.00000000 0.00000000 0.00000000
   0.0001300799 0.0001869090 -0.0073752298
16 H  3.256680000 3.760490000 10.866900000 0.00000000 0.00000000 0.00000000
   0.0001318796 -0.0002306383 -0.0071142628
17 H  6.513360000 3.760490000 10.866900000 0.00000000 0.00000000 0.00000000
   -0.0000673809 0.0001246883 -0.0073202082
18 H  -1.628340000 6.580858000 10.866900000 0.00000000 0.00000000 0.00000000
   0.0000310924 0.0000316143 -0.0074073686
19 H  1.628340000 6.580858000 10.866900000 0.00000000 0.00000000 0.00000000
   -0.0003041796 -0.0002393801 -0.0073490046
20 H  4.885020000 6.580858000 10.866900000 0.00000000 0.00000000 0.00000000
   0.0043078668 -0.0008399900 -0.0001095470
21 S  0.000000000 1.880245000 8.569100000 0.00000000 0.00000000 0.00000000
   0.0024990951 -0.0224596322 0.0233288941
22 S  3.256680000 1.880245000 8.569100000 0.00000000 0.00000000 0.00000000
   -0.0003252627 -0.0001324221 -0.0001514560
23 S  6.513360000 1.880245000 8.569100000 0.00000000 0.00000000 0.00000000
   0.0009574611 -0.0004988045 -0.0001877086
24 S  -1.628340000 4.700613000 8.569100000 0.00000000 0.00000000 0.00000000
   0.0000017818 -0.0000370342 -0.0009721524
25 S  1.628340000 4.700613000 8.569100000 0.00000000 0.00000000 0.00000000
   0.0001439638 -0.0000370342 -0.0006710761
26 S  4.885020000 4.700613000 8.569100000 0.00000000 0.00000000 0.00000000
   0.0000781436 0.0007106429 -0.0001619975
27 S  -3.256680000 7.520980000 8.569100000 0.00000000 0.00000000 0.00000000
   -0.0068422400 0.0053121477 0.0133272996
28 S  0.000000000 7.520980000 8.569100000 0.00000000 0.00000000 0.00000000
   0.0001475634 0.0000303287 -0.0008525961

```

```

29 | S    3.2566800000    7.5209800000    8.5691000000    0.00000000    0.00000000    0.00000000
    |    0.0318793576    0.0169672192    0.0330859767
30 | 27
31 | Lattice="9.77004 0.0 0.0 -4.88502 8.46110284 0.0 0.0 0.0 20.0" Properties=species:S:1:
    | pos:R:3:displacements:R:3:forces:R:3 pbc="T T T"
32 | Cr   0.0000000000    0.0000000000    10.0000000000   -0.00438930    0.00000000    -0.00898521
    |    0.0488561182    0.0000840854    0.0902102794
33 | ...

```

These resources and example files enable readers to replicate similar workflows to calculate phonon dispersion and apply rotational sum rules.
