# Supplementary figures and images for: Half-metallic and ferromagnetic phases in CrSH monolayers using DFT+U and BO-MD calculations
Source: Royal Society of Chemistry journal article supplement (doi:10.1039/d4cp04563g), 2025-01-01

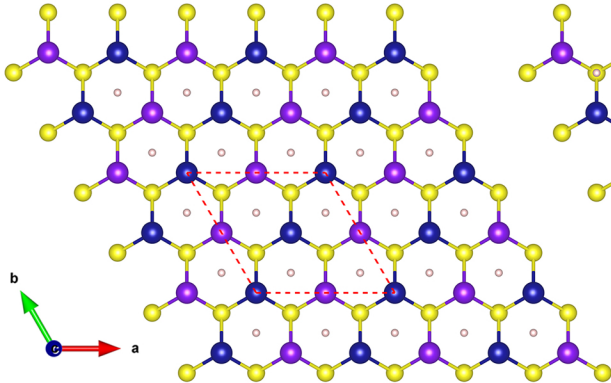

**1T-CrSH**

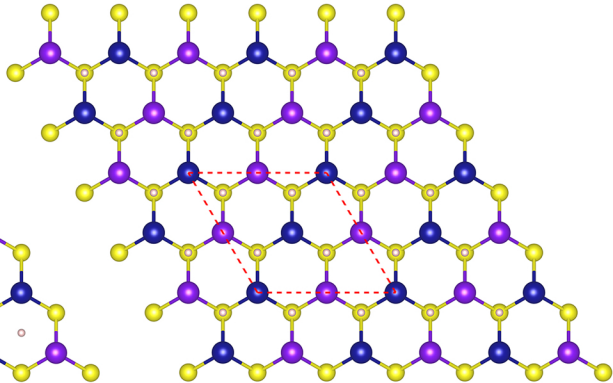

**1H-CrSH**

Supplement: d4cp04563g1.zip [file d4cp04563g1.zip]
